# Supplementary material for: Effectiveness of Technology-Enabled, Low Carbohydrate Dietary Interventions, in the Prevention or Treatment of Type 2 Diabetes Mellitus in Adults: A Systematic Literature Review of Randomised Controlled and Non-Randomised Trials
Source: MDPI journal article supplement (doi:10.3390/nu15204362), 2023-10-13
Supplement: s1 [file s1]

# Effectiveness of Technology-Enabled, Low Carbohydrate Dietary Interventions, in the Prevention or Treatment of Type 2 Diabetes Mellitus in Adults: A Systematic Literature Review of Randomised Controlled and Non-Randomised Trials

## Author Information:

Bernice Rozemai Jooste, Despina Kolivas, Peter Brukner and George Moschonis \*

School of Allied Health, Human Services & Sport, La Trobe University,  
Bundoora 3086, Australia; 18790557@students.latrobe.edu.au (B.R.J.); d.kolivas@latrobe.edu.au  
(D.K.); p.brukner@latrobe.edu.au (P.B.)  
\* Correspondence: g.moschonis@latrobe.edu.au

## Supplementary Material

|                                                                       |   |
|-----------------------------------------------------------------------|---|
| Supplementary Table S1: PICO(S) Summary of Eligibility Criteria ..... | 1 |
| Supplementary Table S2: Medline/Ovid search strategy .....            | 3 |
| Supplementary Table S3: CINAHL/EBSCO search strategy .....            | 5 |
| Supplementary Table S4: EMBASE/Ovid search strategy.....              | 7 |
| Supplementary Table S5: Web of Science search strategy.....           | 9 |

**Supplementary Table S1: PICO(S) Summary of Eligibility Criteria**

|                     | <b>Eligibility Criteria</b>                                                                                                                                                                                                                                                             |                                                                                                                                                      |
|---------------------|-----------------------------------------------------------------------------------------------------------------------------------------------------------------------------------------------------------------------------------------------------------------------------------------|------------------------------------------------------------------------------------------------------------------------------------------------------|
| <b>Criteria</b>     | <b>Inclusion Criteria</b>                                                                                                                                                                                                                                                               | <b>Exclusion Criteria</b>                                                                                                                            |
| <b>Population</b>   | Adults with T2D (>18 years)<br>Adults with prediabetes (>18 years)                                                                                                                                                                                                                      | Children and adolescents (<18 years)<br>Animal studies                                                                                               |
| <b>Intervention</b> | Any digital health intervention (e.g., mobile phone and tablet apps, websites)<br>Studies investigating LCDs (<26% calories from carbohydrates or <130 g/day) or VLCDs (10% calories from carbohydrates or <50 g/day)<br>Technology enabled Low Carbohydrate Dietary (LCD) Intervention | Digital health interventions consisting of only tele-counselling or tele-monitoring.<br>Any dietary approach that does not fit the definition of LCD |
| <b>Comparison</b>   | Non-technology enabled interventions, standard or usual care e.g., face- to-face interventions, diabetic educators, health education or promotion. Different dietary approaches (e.g., Low-fat diet)                                                                                    | Comparators that include digital health interventions                                                                                                |
| <b>Outcome</b>      | Primary Outcome<br>Glycosylated haemoglobin (HbA <sub>1c</sub> )<br>Secondary Outcome<br>BMI<br>Body weight (BW)<br>% of participants achieving remission of T2D (HbA <sub>1c</sub> <6.5 for at least 3 months and without any use of medication)                                       | Not reporting HbA <sub>1c</sub>                                                                                                                      |
| <b>Study Design</b> | Randomised controlled trials and non-randomised trials                                                                                                                                                                                                                                  | Observational, cross-sectional, case studies, case series, case-control, systematic reviews, meta-analyses.                                          |

*Note.* HbA<sub>1c</sub> = Haemoglobin A1c, BMI = Body Mass Index, LCDs = low carbohydrate diets, VLCD = very low carbohydrate diets

## Supplementary Table S2: Medline/Ovid search strategy

Date of search: 9/04/2023

|              | #  | Search String                                                                                                                                                                                                                                                                                                                                                                                                                                                                                                                                                                                                                                                  |
|--------------|----|----------------------------------------------------------------------------------------------------------------------------------------------------------------------------------------------------------------------------------------------------------------------------------------------------------------------------------------------------------------------------------------------------------------------------------------------------------------------------------------------------------------------------------------------------------------------------------------------------------------------------------------------------------------|
| Population   | 1  | <b>MeSH:</b><br>exp Diabetes Mellitus, Type 2 +                                                                                                                                                                                                                                                                                                                                                                                                                                                                                                                                                                                                                |
|              | 2  | <b>Keywords:</b><br>((diabet* adj2 "type 2") or "type ii")                                                                                                                                                                                                                                                                                                                                                                                                                                                                                                                                                                                                     |
|              | 3  | (T2D OR T2DM) OR ("Type 2" or "Type ii") OR (TIID OR TIIDM)                                                                                                                                                                                                                                                                                                                                                                                                                                                                                                                                                                                                    |
|              | 4  | (Pre-diabet* OR prediabet*)                                                                                                                                                                                                                                                                                                                                                                                                                                                                                                                                                                                                                                    |
|              | 5  | 1 OR 2 OR 3 OR 4                                                                                                                                                                                                                                                                                                                                                                                                                                                                                                                                                                                                                                               |
| Intervention | 6  | <b>MeSH:</b><br>exp Diet, Carbohydrate-Restricted +                                                                                                                                                                                                                                                                                                                                                                                                                                                                                                                                                                                                            |
|              | 7  | <b>Keywords:</b><br>(diet* adj2 carb*) OR (carb* adj2 restrict*) OR (carb* adj2 low) OR "very low carb*"                                                                                                                                                                                                                                                                                                                                                                                                                                                                                                                                                       |
|              | 8  | (LCD OR VLCD OR VLCKD)                                                                                                                                                                                                                                                                                                                                                                                                                                                                                                                                                                                                                                         |
|              | 9  | (keto adj2 diet*) OR (Keto* OR KD)                                                                                                                                                                                                                                                                                                                                                                                                                                                                                                                                                                                                                             |
|              | 10 | "Nutritional ketosis"                                                                                                                                                                                                                                                                                                                                                                                                                                                                                                                                                                                                                                          |
|              | 11 | ("low* carb*" adj2 "health* fat*") OR LCHF                                                                                                                                                                                                                                                                                                                                                                                                                                                                                                                                                                                                                     |
|              | 12 | ("high protein" adj2 low* carb*) OR "high* protein*" OR "Atkins diet*"                                                                                                                                                                                                                                                                                                                                                                                                                                                                                                                                                                                         |
|              | 13 | 6 OR 7 OR 8 OR 9 OR 10 OR 11 OR 12                                                                                                                                                                                                                                                                                                                                                                                                                                                                                                                                                                                                                             |
| Intervention | 14 | <b>MeSH:</b><br>exp Telemedicine +                                                                                                                                                                                                                                                                                                                                                                                                                                                                                                                                                                                                                             |
|              | 15 | <b>Keywords:</b><br>(tele* adj2 health*) OR (*Telecommunications OR Computers OR handheld OR microcomputers OR "User-computer interface" OR Internet)                                                                                                                                                                                                                                                                                                                                                                                                                                                                                                          |
|              | 16 | "Health education" OR "virtual health" OR "virtual medicine" OR "virtual care" OR "virtual intervention" OR "remot* health" OR "distal technology*" OR "remote monitor*" OR "health services accessibility" OR (therapy adj2 "computer assisted") OR (delivery adj2 "health care")                                                                                                                                                                                                                                                                                                                                                                             |
|              | 17 | ("Smart-phone*" OR smartphone* OR iphone OR android) OR "*social networking" OR podcast* OR "text messag*" OR app OR apps OR "virtual reality" OR ipad* OR "tablet comput*" OR "tablet device*" OR "instant messag*" OR SMS* OR whatsapp OR Youtube* OR "video gam*" OR "interactive computer model"                                                                                                                                                                                                                                                                                                                                                           |
|              | 18 | (m-health* OR mhealth* OR "Mobile health" OR "Mobile app*" OR "Mobile application*") OR (e-health* OR ehealth* OR "electronic health*" OR e-technolog* OR etechnolog* OR "electronic system*") OR ("digital health*" OR "digital technolog*") OR (e-learning* OR elearning* OR e-medicine* OR emedicine* OR e-therap* OR etherap*) OR ("health information technolog*" OR "info* tech*" OR e-support*)                                                                                                                                                                                                                                                         |
|              | 19 | ((online OR "online intervention" OR on-line OR digital* OR electronic OR computer* OR software OR internet* OR web OR website* OR technology-based OR interactiv* OR telecommunicat* OR "information and communication technolog*" OR ICT) OR (support OR "self-help" OR chat OR communicat* OR "self care" OR "self manag*" OR "self-manag*" OR "self efficac*" OR selfefficac* OR "self-monitor*" OR intervention* OR education* OR training OR learning OR teaching OR "health information*" OR "information service*" OR lifestyle* OR "life style*" OR motivat* OR healthcare OR "health care" OR "health promotion*" OR "home health*" OR "home care")) |

(Continues)

Table S2 (Continued)

|                     | #  | Search String                                                                                                                                                                                                                                                            |
|---------------------|----|--------------------------------------------------------------------------------------------------------------------------------------------------------------------------------------------------------------------------------------------------------------------------|
| <b>Intervention</b> | 20 | <b>Keywords:</b><br>"Internet based" OR "app* based" OR Web-based OR "technology-assisted" OR webcast* OR "lifestyle app*" OR "Computer-assisted" OR "Computer-based " OR "Computer interface"                                                                           |
|                     | 21 | (glucose adj2 app*) OR "continuous glucose monitoring" OR CGM OR "health monitor* app*"                                                                                                                                                                                  |
|                     | 22 | 14 OR 15 OR 16 OR 17 OR 18 OR 19 OR 20 OR 21                                                                                                                                                                                                                             |
| <b>Outcome</b>      | 23 | <b>MeSH:</b><br>exp Glycated hemoglobin +                                                                                                                                                                                                                                |
|                     | 24 | <b>Keywords:</b><br>"Glycosylated h?emoglobin" OR ("H?emoglobin A" OR "H?emoglobin A1c") OR (HbA1c OR A1c) OR "Glyc* control" OR Hyperglyc* OR "Blood glucose level" OR BGL OR "blood sugar level" OR BSL OR "Fasting blood glucose" OR FBG                              |
|                     | 25 | <b>MeSH:</b><br>exp Weight Loss +                                                                                                                                                                                                                                        |
|                     | 26 | <b>Keywords:</b><br>Weight-loss* OR (reduc* adj2 weight) OR (weight adj2 loss*) OR "Body mass index" OR BMI OR (waist adj2 circumference)                                                                                                                                |
|                     | 27 | 23 OR 24 OR 25 OR 26                                                                                                                                                                                                                                                     |
| <b>Study Design</b> | 28 | <b>RCT Filter:</b><br>Randomized controlled trial.pt.                                                                                                                                                                                                                    |
|                     | 29 | Controlled clinical trial.pt.                                                                                                                                                                                                                                            |
|                     | 30 | Randomized.ab.                                                                                                                                                                                                                                                           |
|                     | 31 | Placebo.ab.                                                                                                                                                                                                                                                              |
|                     | 32 | Drug therapy.fs.                                                                                                                                                                                                                                                         |
|                     | 33 | Randomly.ab.                                                                                                                                                                                                                                                             |
|                     | 34 | Trial.ab.                                                                                                                                                                                                                                                                |
|                     | 35 | Groups.ab.                                                                                                                                                                                                                                                               |
|                     | 36 | 28 OR 29 OR 30 OR 31 OR 32 OR 33 OR 34 OR 35                                                                                                                                                                                                                             |
|                     | 37 | exp animals/ not humans.sh.                                                                                                                                                                                                                                              |
|                     | 38 | 36 NOT 37                                                                                                                                                                                                                                                                |
|                     | 38 | 5 AND 13 AND 22 AND 27 AND 36                                                                                                                                                                                                                                            |
|                     | 39 | Limit 91 to English language and yr="2009 – 2023"                                                                                                                                                                                                                        |
|                     | 40 | Limit 92 to ("all adult (19 plus years)" or "(young adult (19 to 24 years)" or "Adult (19-44 years)" OR "young adult and adult (19-24 and 19-44)" or "middle age (45 to 64 years)" or "(middle aged (45 plus years)" or "all aged (65 and over)" or "aged (80 and over)" |

NOTE. exp = explode MeSH, + is explode results (include all subheadings); adj2 (words adjacent to each other in any order within 2 words), "... " (exact phrase searching), \* Truncation (to expand spelling and endings of words)? wildcards (adds one character),. ab (abstract word), .pt (publication type), fs (floating subheading), "OR" – includes either both, the one or the other term), "AND" – includes both terms.

# Supplementary Table S3: CINAHL/EBSCO search strategy

Date of search: 9/04/2023

|              | #  | Search String                                                                                                                                                                                                                                                                                                                                                                                                                                                                                                                                                                                                                                                  |
|--------------|----|----------------------------------------------------------------------------------------------------------------------------------------------------------------------------------------------------------------------------------------------------------------------------------------------------------------------------------------------------------------------------------------------------------------------------------------------------------------------------------------------------------------------------------------------------------------------------------------------------------------------------------------------------------------|
| Population   | 1  | <b>MeSH:</b><br>MH Diabetes Mellitus, Type 2 +                                                                                                                                                                                                                                                                                                                                                                                                                                                                                                                                                                                                                 |
|              | 2  | <b>Keywords:</b><br>((diabet* N2 "type 2") or "type ii")                                                                                                                                                                                                                                                                                                                                                                                                                                                                                                                                                                                                       |
|              | 3  | (T2D OR T2DM) OR ("Type 2" or "Type ii") OR (TIID OR TIIDM)                                                                                                                                                                                                                                                                                                                                                                                                                                                                                                                                                                                                    |
|              | 4  | (Pre-diabet* OR prediabet*)                                                                                                                                                                                                                                                                                                                                                                                                                                                                                                                                                                                                                                    |
|              | 5  | 1 OR 2 OR 3 OR 4                                                                                                                                                                                                                                                                                                                                                                                                                                                                                                                                                                                                                                               |
| Intervention | 6  | <b>MeSH:</b><br>MH Diet, Carbohydrate-Restricted +                                                                                                                                                                                                                                                                                                                                                                                                                                                                                                                                                                                                             |
|              | 7  | <b>Keywords:</b><br>(diet* N2 carb*) OR (carb* N2 restrict*) OR (carb* N2 low) OR "very low carb*"                                                                                                                                                                                                                                                                                                                                                                                                                                                                                                                                                             |
|              | 8  | (LCD OR VLCD OR VLCKD)                                                                                                                                                                                                                                                                                                                                                                                                                                                                                                                                                                                                                                         |
|              | 9  | (keto N2 diet*) OR (Keto* OR KD)                                                                                                                                                                                                                                                                                                                                                                                                                                                                                                                                                                                                                               |
|              | 10 | "Nutritional ketosis"                                                                                                                                                                                                                                                                                                                                                                                                                                                                                                                                                                                                                                          |
|              | 11 | ("low* carb*" N2 "health* fat*") OR LCHF                                                                                                                                                                                                                                                                                                                                                                                                                                                                                                                                                                                                                       |
|              | 12 | ("high protein" N2 low* carb*) OR "high* protein*" OR "Atkins diet*"                                                                                                                                                                                                                                                                                                                                                                                                                                                                                                                                                                                           |
|              | 13 | 6 OR 7 OR 8 OR 9 OR 10 OR 11 OR 12                                                                                                                                                                                                                                                                                                                                                                                                                                                                                                                                                                                                                             |
| Intervention | 14 | <b>MeSH:</b><br>MH Telemedicine +                                                                                                                                                                                                                                                                                                                                                                                                                                                                                                                                                                                                                              |
|              | 15 | <b>Keywords:</b><br>(tele* N2 health*) OR (*Telecommunications OR Computers OR handheld OR microcomputers OR "User-computer interface" OR Internet)                                                                                                                                                                                                                                                                                                                                                                                                                                                                                                            |
|              | 16 | "Health education" OR "virtual health" OR "virtual medicine" OR "virtual care" OR "virtual intervention" OR "remot* health" OR "distal technology*" OR "remote monitor*" OR "health services accessibility" OR (therapy N2 "computer assisted") OR (delivery N2 "health care")                                                                                                                                                                                                                                                                                                                                                                                 |
|              | 17 | ("Smart-phone*" OR smartphone* OR iphone OR android) OR "*social networking" OR podcast* OR "text messag*" OR app OR apps OR "virtual reality" OR ipad* OR "tablet comput*" OR "tablet device*" OR "instant messag*" OR SMS* OR whatsapp OR Youtube* OR "video gam*" OR "interactive computer model"                                                                                                                                                                                                                                                                                                                                                           |
|              | 18 | (m-health* OR mhealth* OR "Mobile health" OR "Mobile app*" OR "Mobile application*") OR (e-health* OR ehealth* OR "electronic health*" OR e-technolog* OR etechnolog* OR "electronic system*") OR ("digital health*" OR "digital technolog*") OR (e-learning* OR elearning* OR e-medicine* OR emedicine* OR e-therap* OR etherap*) OR ("health information technolog*" OR "info* tech*" OR e-support*)                                                                                                                                                                                                                                                         |
|              | 19 | ((online OR "online intervention" OR on-line OR digital* OR electronic OR computer* OR software OR internet* OR web OR website* OR technology-based OR interactiv* OR telecommunicat* OR "information and communication technolog*" OR ICT) OR (support OR "self-help" OR chat OR communicat* OR "self care" OR "self manag*" OR "self-manag*" OR "self efficac*" OR selfefficac* OR "self-monitor*" OR intervention* OR education* OR training OR learning OR teaching OR "health information*" OR "information service*" OR lifestyle* OR "life style*" OR motivat* OR healthcare OR "health care" OR "health promotion*" OR "home health*" OR "home care")) |

(Continues)

Table S3 (Continued)

|                     | #  | Search String                                                                                                                                                                                                                               |
|---------------------|----|---------------------------------------------------------------------------------------------------------------------------------------------------------------------------------------------------------------------------------------------|
| <b>Intervention</b> | 20 | <b>Keywords:</b><br>"Internet based" OR "app* based" OR Web-based OR "technology-assisted" OR webcast* OR "lifestyle app*" OR "Computer-assisted" OR "Computer-based " OR "Computer interface"                                              |
|                     | 21 | (glucose N2 app*) OR "continuous glucose monitoring" OR CGM OR "health monitor* app*"                                                                                                                                                       |
|                     | 22 | 14 OR 15 OR 16 OR 17 OR 18 OR 19 OR 20 OR 21                                                                                                                                                                                                |
| <b>Outcome</b>      | 23 | <b>MeSH:</b><br>MH Hemoglobin A +                                                                                                                                                                                                           |
|                     | 24 | <b>Keywords:</b><br>"Glycosylated h?emoglobin" OR ("H?emoglobin A" OR "H?emoglobin A1c") OR (HbA1c OR A1c) OR "Glyc* control" OR Hyperglyc* OR "Blood glucose level" OR BGL OR "blood sugar level" OR BSL OR "Fasting blood glucose" OR FBG |
|                     | 25 | <b>MeSH:</b><br>MH Weight Loss +                                                                                                                                                                                                            |
|                     | 26 | <b>Keywords:</b><br>Weight-loss* OR (reduc* N2 weight) OR (weight N2 loss*) OR "Body mass index" OR BMI OR (waist N2 circumference)                                                                                                         |
|                     | 27 | 23 OR 24 OR 25 OR 26                                                                                                                                                                                                                        |
| <b>Study Design</b> | 28 | <b>RCT Filter:</b><br>TX random* OR factorial* OR placebo* OR assign* OR allocat* OR crossover*                                                                                                                                             |
|                     | 29 | TX "cross over"                                                                                                                                                                                                                             |
|                     | 30 | TX trial and TX (control* OR comparative)                                                                                                                                                                                                   |
|                     | 31 | TX (blind* OR mask*) and TX (single OR double OR triple OR treble)                                                                                                                                                                          |
|                     | 32 | TX "treatment arm"                                                                                                                                                                                                                          |
|                     | 33 | TX "control group*"                                                                                                                                                                                                                         |
|                     | 34 | TX phase and TX (three OR III)                                                                                                                                                                                                              |
|                     | 35 | TX versus OR vs                                                                                                                                                                                                                             |
|                     | 36 | (MH "Clinical Trials+")                                                                                                                                                                                                                     |
|                     | 37 | (MH "Random Assignment")                                                                                                                                                                                                                    |
|                     | 38 | (MH "Quantitative Studies")                                                                                                                                                                                                                 |
|                     | 39 | (MH "Placebos")                                                                                                                                                                                                                             |
|                     | 40 | TX rct                                                                                                                                                                                                                                      |
|                     | 41 | S28 OR S29 OR S30 OR S31 OR S32 OR S33 OR S34 OR S35 OR S36 OR S37 OR S38 OR S39 OR S40                                                                                                                                                     |
|                     | 42 | 5 AND 13 AND 22 AND 27 AND 41                                                                                                                                                                                                               |
|                     | 43 | Limit to English language                                                                                                                                                                                                                   |
|                     | 44 | Limit Published Date: 2009/0/101-2023                                                                                                                                                                                                       |
|                     | 45 | Limit to Adult (19-44 years)" OR (middle aged 45-64) or aged 65+ years OR "aged (80 and over)"                                                                                                                                              |

*Note.* Cinahl / database coverage: 2009 to present, MH = MeSH, + is explode results (include all subheadings); N2 (finds the words if they are within two words of one another regardless of order), "... " (exact phrase searching), \* Truncation (to expand spelling and endings of words), ? wildcards (adds one character), .ab (abstract word), .pt (publication type), fs (floating subheading), "OR" – includes either both, the one or the other term), "AND" – includes both terms.

## Supplementary Table S4: EMBASE/Ovid search strategy

EMBASE/Ovid (database coverage 2009-2023)

|              | #  | Search String                                                                                                                                                                                                                                                                                                                                                                                                                                                                                                                                                                                                                                                  |
|--------------|----|----------------------------------------------------------------------------------------------------------------------------------------------------------------------------------------------------------------------------------------------------------------------------------------------------------------------------------------------------------------------------------------------------------------------------------------------------------------------------------------------------------------------------------------------------------------------------------------------------------------------------------------------------------------|
| Population   | 1  | <b>MeSH:</b><br>Exp non-insulin dependent diabetes mellitus +                                                                                                                                                                                                                                                                                                                                                                                                                                                                                                                                                                                                  |
|              | 2  | <b>Keywords:</b><br>((diabet* adj2 "type 2") or "type ii")                                                                                                                                                                                                                                                                                                                                                                                                                                                                                                                                                                                                     |
|              | 3  | (T2D OR T2DM) OR ("Type 2" or "Type ii") OR (TIID OR TIIDM)                                                                                                                                                                                                                                                                                                                                                                                                                                                                                                                                                                                                    |
|              | 4  | (Pre-diabet* OR prediabet*)                                                                                                                                                                                                                                                                                                                                                                                                                                                                                                                                                                                                                                    |
|              | 5  | 1 OR 2 OR 3 OR 4                                                                                                                                                                                                                                                                                                                                                                                                                                                                                                                                                                                                                                               |
| Intervention | 6  | <b>MeSH:</b><br>exp low Carbohydrate diet +                                                                                                                                                                                                                                                                                                                                                                                                                                                                                                                                                                                                                    |
|              | 7  | <b>Keywords:</b><br>(diet* adj2 carb*) OR (carb* adj2 restrict*) OR (carb* adj2 low) OR "very low carb*"                                                                                                                                                                                                                                                                                                                                                                                                                                                                                                                                                       |
|              | 8  | (LCD OR VLCD OR VLCKD)                                                                                                                                                                                                                                                                                                                                                                                                                                                                                                                                                                                                                                         |
|              | 9  | (keto adj2 diet*) OR (Keto* OR KD)                                                                                                                                                                                                                                                                                                                                                                                                                                                                                                                                                                                                                             |
|              | 10 | "Nutritional ketosis"                                                                                                                                                                                                                                                                                                                                                                                                                                                                                                                                                                                                                                          |
|              | 11 | ("low* carb*" adj2 "health* fat*") OR LCHF                                                                                                                                                                                                                                                                                                                                                                                                                                                                                                                                                                                                                     |
|              | 12 | ("high protein" adj2 low* carb*) OR "high* protein*" OR "Atkins diet*"                                                                                                                                                                                                                                                                                                                                                                                                                                                                                                                                                                                         |
|              | 13 | 6 OR 7 OR 8 OR 9 OR 10 OR 11 OR 12                                                                                                                                                                                                                                                                                                                                                                                                                                                                                                                                                                                                                             |
| Intervention | 14 | <b>MeSH:</b><br>exp Telemedicine +                                                                                                                                                                                                                                                                                                                                                                                                                                                                                                                                                                                                                             |
|              | 15 | <b>Keywords:</b><br>(tele* adj2 health*) OR (*Telecommunications OR Computers OR handheld OR microcomputers OR "User-computer interface" OR Internet)                                                                                                                                                                                                                                                                                                                                                                                                                                                                                                          |
|              | 16 | "Health education" OR "virtual health" OR "virtual medicine" OR "virtual care" OR "virtual intervention" OR "remot* health" OR "distal technology*" OR "remote monitor*" OR "health services accessibility" OR (therapy adj2 "computer assisted") OR (delivery adj2 "health care")                                                                                                                                                                                                                                                                                                                                                                             |
|              | 17 | ("Smart-phone*" OR smartphone* OR iphone OR android) OR "*social networking" OR podcast* OR "text messag*" OR app OR apps OR "virtual reality" OR ipad* OR "tablet comput*" OR "tablet device*" OR "instant messag*" OR SMS* OR whatsapp OR Youtube* OR "video gam*" OR "interactive computer model"                                                                                                                                                                                                                                                                                                                                                           |
|              | 18 | (m-health* OR mhealth* OR "Mobile health" OR "Mobile app*" OR "Mobile application*") OR (e-health* OR ehealth* OR "electronic health*" OR e-technolog* OR etechnolog* OR "electronic system*") OR ("digital health*" OR "digital technolog*") OR (e-learning* OR elearning* OR e-medicine* OR emedicine* OR e-therap* OR etherap*) OR ("health information technolog*" OR "info* tech*" OR e-support*)                                                                                                                                                                                                                                                         |
|              | 19 | ((online OR "online intervention" OR on-line OR digital* OR electronic OR computer* OR software OR internet* OR web OR website* OR technology-based OR interactiv* OR telecommunicat* OR "information and communication technolog*" OR ICT) OR (support OR "self-help" OR chat OR communicat* OR "self-care" OR "self manag*" OR "self-manag*" OR "self efficac*" OR selfefficac* OR "self-monitor*" OR intervention* OR education* OR training OR learning OR teaching OR "health information*" OR "information service*" OR lifestyle* OR "life style*" OR motivat* OR healthcare OR "health care" OR "health promotion*" OR "home health*" OR "home care")) |

(Continues)

Table S4 (Continued)

|                     | #  | Search String                                                                                                                                                                                                                               |
|---------------------|----|---------------------------------------------------------------------------------------------------------------------------------------------------------------------------------------------------------------------------------------------|
| <b>Intervention</b> | 20 | <b>Keywords:</b><br>"Internet based" OR "app* based" OR Web-based OR "technology-assisted" OR webcast* OR "lifestyle app*" OR "Computer-assisted" OR "Computer-based " OR "Computer interface"                                              |
|                     | 21 | (glucose adj2 app*) OR "continuous glucose monitoring" OR CGM OR "health monitor* app*"                                                                                                                                                     |
|                     | 22 | 14 OR 15 OR 16 OR 17 OR 18 OR 19 OR 20 OR 21                                                                                                                                                                                                |
| <b>Outcome</b>      | 23 | <b>MeSH:</b><br>exp Glycosylated hemoglobin +                                                                                                                                                                                               |
|                     | 24 | <b>Keywords:</b><br>"Glycosylated h?emoglobin" OR ("H?emoglobin A" OR "H?emoglobin A1c") OR (HbA1c OR A1c) OR "Glyc* control" OR Hyperglyc* OR "Blood glucose level" OR BGL OR "blood sugar level" OR BSL OR "Fasting blood glucose" OR FBG |
|                     | 25 | <b>MeSH:</b><br>Exp body weight Loss +                                                                                                                                                                                                      |
|                     | 26 | <b>Keywords:</b><br>Weight-loss* OR (reduc* adj2 weight) OR (weight adj2 loss*) OR "Body mass index" OR BMI OR (waist adj2 circumference)                                                                                                   |
|                     | 27 | 23 OR 24 OR 25 OR 26                                                                                                                                                                                                                        |
| <b>Study Design</b> | 28 | <b>RCT Filter:</b><br>(random* or factorial* or placebo* or assign* or allocat* or crossover*).tw.                                                                                                                                          |
|                     | 29 | (cross adj over*).tw.                                                                                                                                                                                                                       |
|                     | 30 | (trial* and (control* or comparative)).tw.                                                                                                                                                                                                  |
|                     | 31 | ((blind* or mask*) and (single or double or triple or treble)).tw.                                                                                                                                                                          |
|                     | 32 | (treatment adj arm*).tw.                                                                                                                                                                                                                    |
|                     | 33 | (control* adj group*).tw.                                                                                                                                                                                                                   |
|                     | 34 | (phase adj (III or three)).tw.                                                                                                                                                                                                              |
|                     | 35 | (versus or vs).tw.                                                                                                                                                                                                                          |
|                     | 36 | rct.tw.                                                                                                                                                                                                                                     |
|                     | 37 | Crossover Procedure/                                                                                                                                                                                                                        |
|                     | 38 | DOUBLE BLIND PROCEDURE/                                                                                                                                                                                                                     |
|                     | 39 | SINGLE BLIND PROCEDURE/                                                                                                                                                                                                                     |
|                     | 40 | RANDOMIZATION/                                                                                                                                                                                                                              |
|                     | 41 | PLACEBO/                                                                                                                                                                                                                                    |
|                     | 42 | exp Clinical Trial/                                                                                                                                                                                                                         |
|                     | 43 | PARALLEL DESIGN/                                                                                                                                                                                                                            |
|                     | 44 | LATIN SQUARE DESIGN/                                                                                                                                                                                                                        |
|                     | 45 | 28 OR 29 OR 30 OR 31 OR 32 OR 33 OR 34 OR 35 OR 36 OR 37 OR 38 OR 39 OR 40 OR 41 OR 42 OR 43 OR 44                                                                                                                                          |
|                     | 46 | exp ANIMAL/ or exp NONHUMAN/ or exp ANIMAL EXPERIMENT/ or exp ANIMAL MODEL/                                                                                                                                                                 |
|                     | 47 | exp HUMAN/                                                                                                                                                                                                                                  |
|                     | 48 | 46 NOT 47                                                                                                                                                                                                                                   |
|                     | 49 | 45 NOT 48                                                                                                                                                                                                                                   |
|                     | 50 | 5 AND 13 AND 22 AND 27 AND 45                                                                                                                                                                                                               |
|                     | 51 | Limit to English language                                                                                                                                                                                                                   |
|                     | 52 | Limit Published Date: 2009/0/101-2023                                                                                                                                                                                                       |
|                     | 53 | Limit to (Adult < 18 TO 64 years > or aged <65+ years>)                                                                                                                                                                                     |

NOTE. exp = explode MeSH, + is explode results (include all subheadings); adj2 (words adjacent to each other in any order within 2 words), "... " (exact phrase searching), \* Truncation (to expand spelling and endings of words)? wildcards (adds one character), . ab (abstract word), .pt (publication type), .fs (floating subheading), "OR" – includes either both, the one or the other term), "AND" – includes both terms.



## Supplementary Table S5: Web of Science search strategy

Date of search: 9/04/2023

|              | # | Search                                                                                                                                                                                                                                                                                                                                                                                                                                                                                                                                                                                                                                                                                                                                                                                                                                                                                        |
|--------------|---|-----------------------------------------------------------------------------------------------------------------------------------------------------------------------------------------------------------------------------------------------------------------------------------------------------------------------------------------------------------------------------------------------------------------------------------------------------------------------------------------------------------------------------------------------------------------------------------------------------------------------------------------------------------------------------------------------------------------------------------------------------------------------------------------------------------------------------------------------------------------------------------------------|
| Population   | 1 | Topic (TS):<br>TS=("Diabetes mellitus, type 2" OR "Type 2 diabet*" OR "Type 2 diabetes mellitus" OR "Diabetes mellitus type ii" OR T2D OR T2DM OR "type II" OR "Type ii" OR TIID OR TIIDM OR "non-insulin dependent diabetes mellitus" OR "Diabetes mellitus non-insulin dependent" OR "Diabetes mellitus adult onset" OR prediabetes OR diabetic* OR "pre-diabet*" OR "Pre-diabet*" OR prediabet*)                                                                                                                                                                                                                                                                                                                                                                                                                                                                                           |
|              | 2 | Topic (TS):<br>TS=("Diet, Carbohydrate-Restricted" OR "Carbohydrate restricted" OR "Carbohydrate-restricted diets" OR "Dietary carbohydrat* restrict*" OR "Diets carbohydrate-restricted" OR "Diet low carbohydrate"<br>"Carbohydrate diet low" OR " low carb*" OR "diet* carb*" OR "carb* restrict*" OR "carb* low" OR "very low carb*" OR "LCD intervention*" OR LCD OR "carb* restrict* diet*" OR "Low carb* diet*" OR "Diets low carbohydrate" OR "Low carbohydrate diet*" OR "Very low carb*" OR "Very low carb* diet*" OR VLCD OR "Very low carb* keto* diet*" OR VLCKD OR LCD OR<br>"ketogenic" OR "keto* diet*" OR "keto*" OR KD OR "Nutritional ketosis" OR "Low carb* healthy fat" OR LCHF OR "High protein low* carb*" OR "high* protein*" OR "Atkins diet*")                                                                                                                      |
| Intervention | 3 | <b>#1 AND #2</b>                                                                                                                                                                                                                                                                                                                                                                                                                                                                                                                                                                                                                                                                                                                                                                                                                                                                              |
|              | 4 | <b>TS</b> =(tele* adj2 health*) OR (Telecommunications OR Computers OR handheld OR microcomputers OR "User-computer interface" OR Internet) OR "Health education" OR "virtual health" OR "virtual medicine" OR "virtual care" OR "virtual intervention" OR "remot* health" OR "distal technology*" OR "remote monitor*" OR "health services accessibility" OR (therapy "computer assisted") OR (delivery "health care") OR ("Smart-phone*" OR smartphone* OR iphone OR android) OR "social networking" OR podcast* OR "text messag*" OR<br>"app* based" OR app OR apps OR "virtual reality" OR ipad* OR "tablet comput*" OR "tablet device*" OR (m-health* OR mhealth* OR "Mobile health" OR "Mobile app*" OR "Mobile application*") OR (e-health* OR ehealth* OR "electronic health*") OR "instant messag*" OR SMS* OR whatsapp OR Youtube* OR "video gam*" OR "interactive computer model") |

(Continues)

Table S5 (Continued)

|                     | #  | Search                                                                                                                                                                                                                                                                                                                                                                                                                                                                                                                                                                                                                                                                                                                                                                                                                                                                                                                                                                                                                                                                                                                                                                                                                     |
|---------------------|----|----------------------------------------------------------------------------------------------------------------------------------------------------------------------------------------------------------------------------------------------------------------------------------------------------------------------------------------------------------------------------------------------------------------------------------------------------------------------------------------------------------------------------------------------------------------------------------------------------------------------------------------------------------------------------------------------------------------------------------------------------------------------------------------------------------------------------------------------------------------------------------------------------------------------------------------------------------------------------------------------------------------------------------------------------------------------------------------------------------------------------------------------------------------------------------------------------------------------------|
| <b>Intervention</b> | 5  | <b>TS</b> =(e-technolog* OR etechnolog* OR "electronic system*") OR ("digital health*" OR "digital technolog*") OR (e-learning* OR elearning*) OR (e-medicine* OR emedicine* OR e-therap* OR etherap*) OR ("health information technolog*" OR "info* tech*" OR e-support*) OR (online OR "online intervention" OR on-line OR digital* OR electronic OR computer* OR software OR internet* OR "Internet based" OR web OR website* OR technology-based OR interactiv* OR telecommunicat* OR "information and communication technolog*" OR ICT) OR (support OR "self-help") OR chat OR communicat* OR ("self care" OR "self manag*" OR "self-manag*" OR "self efficac*" OR selfefficac* OR "self-monitor*") OR intervention* OR education* OR training OR learning OR teaching OR "health information*" OR "information service*" OR lifestyle* OR "life style*" OR motivat* OR healthcare OR "health care" OR "health promotion*" OR "home health*" OR "home care" OR Web-based OR "technology-assisted" OR webcast* OR "lifestyle app*" OR "Computer-assisted" OR "Computer-based " OR "Computer interface" OR (glucose app*) OR "continuous glucose monitoring" OR CGM OR "health monitor* app*" OR "diabetes prevention") |
|                     | 6  | #4 OR #5                                                                                                                                                                                                                                                                                                                                                                                                                                                                                                                                                                                                                                                                                                                                                                                                                                                                                                                                                                                                                                                                                                                                                                                                                   |
|                     | 7  | #3 AND #6                                                                                                                                                                                                                                                                                                                                                                                                                                                                                                                                                                                                                                                                                                                                                                                                                                                                                                                                                                                                                                                                                                                                                                                                                  |
| <b>Outcome</b>      | 8  | <b>TS</b> =( "Glycosylated h?emoglobin" OR ("H?emoglobin A" OR "H?emoglobin A1c") OR (HbA <sub>1c</sub> OR A1c) OR "Glyc* control" OR Hyperglyc* OR "Blood glucose level" OR BGL OR "blood sugar level" OR BSL OR "Fasting blood glucose" OR FBG OR Body Weight-loss* OR "reduc* weight" OR "weight adj2 loss*" OR "Body mass index" OR BMI OR "waist adj2 circumference")                                                                                                                                                                                                                                                                                                                                                                                                                                                                                                                                                                                                                                                                                                                                                                                                                                                 |
|                     | 9  | <b>RCT Filter:</b><br>TS=(randomised OR randomized OR randomisation OR randomisation OR placebo* OR (random* AND (allocat* OR assign*)) OR (blind* AND (single OR double OR treble OR triple)))                                                                                                                                                                                                                                                                                                                                                                                                                                                                                                                                                                                                                                                                                                                                                                                                                                                                                                                                                                                                                            |
| <b>Study Design</b> | 10 | #7 AND #8 AND #9                                                                                                                                                                                                                                                                                                                                                                                                                                                                                                                                                                                                                                                                                                                                                                                                                                                                                                                                                                                                                                                                                                                                                                                                           |
|                     | 11 | Limit publication years 2009-2023                                                                                                                                                                                                                                                                                                                                                                                                                                                                                                                                                                                                                                                                                                                                                                                                                                                                                                                                                                                                                                                                                                                                                                                          |
|                     | 9  | Limit o English language                                                                                                                                                                                                                                                                                                                                                                                                                                                                                                                                                                                                                                                                                                                                                                                                                                                                                                                                                                                                                                                                                                                                                                                                   |

NOTE. TS - MeSh and keywords were searched together, "OR" – includes either both, the one or the other term), "AND" – includes both terms. \* Truncation (to expand spelling and endings of words).
